# Supplementary material for: CsrA Coordinates Compatible Solute Synthesis in Acinetobacter baumannii and Facilitates Growth in Human Urine
Source: PubMed Central journal article supplement (PMC8567240; doi:10.1128/spectrum.01296-21), 2021-11-03
Supplement: spectrum01296-21_supp_1_seq12.pdf [file spectrum01296-21_supp_1_seq12.pdf]

1 SUPPLEMENTAL MATERIAL

2 **CsrA coordinates compatible solute synthesis in *Acinetobacter baumannii***  
3 **and facilitates growth in human urine**

4  
5  
6 **Josephine Joy Hubloher, Kim Schabacker, Volker Müller, Beate Averhoff\***

7  
8 *Department of Molecular Microbiology & Bioenergetics, Institute of Molecular Biosciences,*  
9 *Goethe-University Frankfurt am Main, Germany;*

10  
11  
12  
13 Running title: CsrA in *A. baumannii* ATCC 19606

14  
15  
16 \*Correspondence to: Beate Averhoff, Department of Molecular Microbiology & Bioenergetics,  
17 Institute of Molecular Biosciences, Goethe-University Frankfurt am Main, Max-von-Laue-Str. 9,  
18 60438 Frankfurt, Germany. Tel.: + 49 69 79829509. E-mail address: [averhoff@bio.uni-frankfurt.de](mailto:averhoff@bio.uni-frankfurt.de)

19

20

21 **SUPPLEMENTAL MATERIAL**

22 **Table S1** Primers used in this study.

|                                                  |                                                 |
|--------------------------------------------------|-------------------------------------------------|
| <i>csrA</i> _upstream fw                         | CCCGGGGGATCCACTAGTTCCGGTACTTCTATGGGTAC          |
| <i>csrA</i> _upstream rev                        | CAACTTCATAGTTTATCTCCTTGCTAAACG                  |
| <i>crsA</i> _downstream fw                       | GGAGATAAACTATGAAGTTGTTCTCTCCC                   |
| <i>crsA</i> _downstream rev                      | CCGCGGTGGCGGCCGCTCTAGATATTCTTATGTAGTGTAATGAC    |
| pBIISK_ <i>sacB</i> _ <i>kan<sup>R</sup></i> fw  | TAGAGCGGCCGCCACCGC                              |
| pBIISK_ <i>sacB</i> _ <i>kan<sup>R</sup></i> rev | GAACTAGTGGATCCCCGGGC                            |
| <i>csrA</i> _up fw                               | AGAATTTGACGTGCAATTCGCACGTGAAGTTTCAACAC          |
| <i>csrA</i> _up rev                              | CCTGAGGCCTGCAGCGGCCGCTAACGATTGAAGTTTTTCTG       |
| pBAV1k fw                                        | CGGCCGCTGCAGGCCTCA                              |
| pBAV1k rev                                       | CGAATTCGACGTCAAATTCTATCATAATTGTGGTTTCAAATCGGCTC |

23

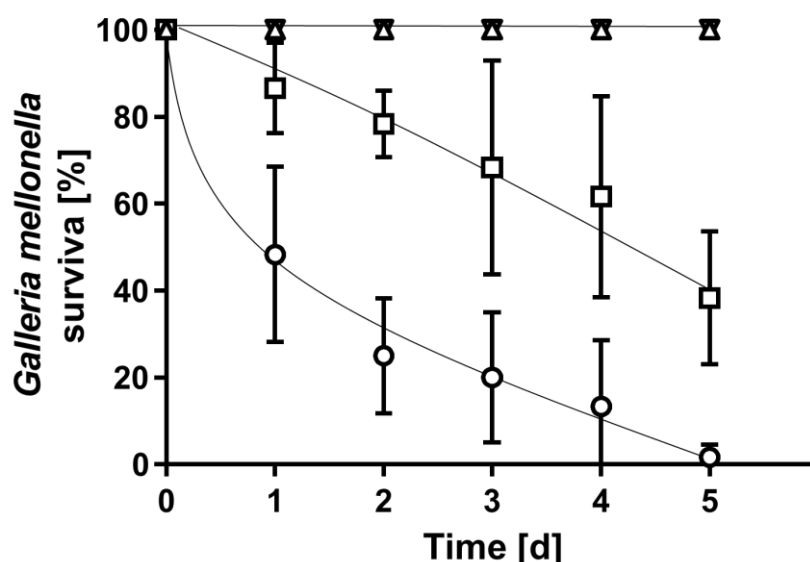

24

25 **Fig. S1** *Galleria mellonella* killing. *A. baumannii* ATCC 19606 (O) and  $\Delta csrA$  (□) were grown  
 26 in mineral medium with succinate (20 mM) to an  $OD_{600nm} = 0.5$ . Bacteria were washed twice with  
 27 saline (0.9 % NaCl) and 10  $\mu$ l of the cell suspension (with approximately  $5 \cdot 10^6$  bacteria) were  
 28 injected into the last proleg of preselected *G. mellonella* caterpillars (weight range between 0.35-  
 29 0.45 g). The control groups were injected with or 10  $\mu$ l saline ( $\Delta$ ) or were not injected at all ( $\nabla$ ).  
 30 Caterpillars were incubated in the dark over 5 day at 37 °C and the number of survived animals  
 31 was determined. Caterpillars were considered dead if they did not respond towards gentle poking.  
 32 Error bars denote the standard deviation calculated from at least three biological replicates.

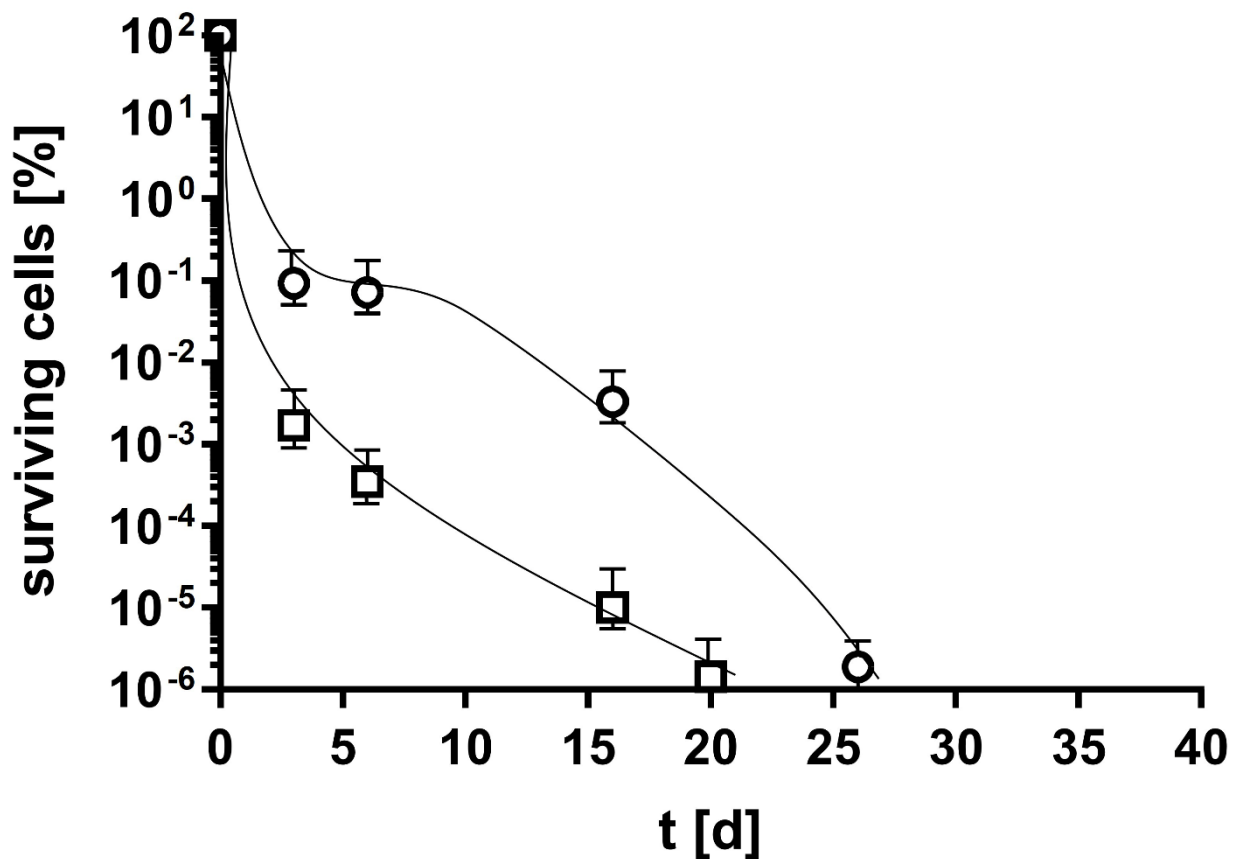

33

34 **Fig. S2** Desiccation resistance of *A. baumannii* ATCC 19606 and  $\Delta csrA$ . An overnight culture of

35 *A. baumannii* ATCC 19606 (○) and  $\Delta csrA$  (□) were grown in mineral medium with 20 mM

36 succinate. 1 ml of the overnight culture was harvested and washed twice in saline (0.9 % NaCl).

37 Cells were adjusted to an  $OD_{600nm} = 2$  and 20  $\mu$ l of the cell suspension was spotted on small

38 polycarbonate filters (Nuclepore Track-Etch Membrane, 13 mm, 0.4  $\mu$ m). The cell suspension was

39 dried in a climate chamber (31% relative humidity and 22°C). Bacterial survival was monitored

40 *via* recovery of the cells from the filters and afterwards plating the cells on mineral medium agar

41 for determination of number of colony forming units. Error bars denote the standard deviation

42 calculated from at least three biological replicates.

43

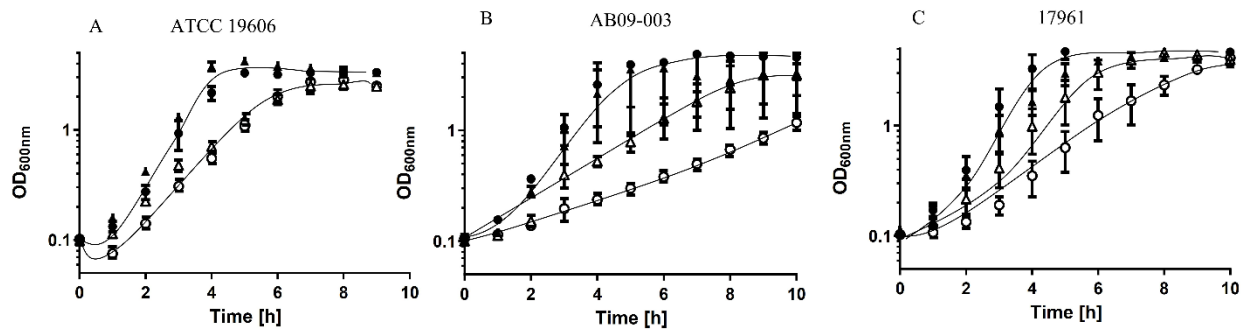

44

45 **Fig. S3** Growth of *A. baumannii* ATCC 19606 and  $\Delta csrA$  mutant in mineral medium with 200 mM

46 NaCl according to Farrow *et al.*. *A. baumannii* ATCC 19606 (A), AB09-003 (B) and 17961 (C)

47 wildtype strain (circle) and the  $\Delta csrA$  strains (squares) were grown overnight in mineral medium

48 with succinate as carbon source. Overnight cultures were used to inoculated prewarmed mineral

49 medium with succinate in absence (closed symbols) or presence of 200 mM NaCl (open symbols).

50 Error bars denote the standard deviation calculated from at least three biological replicates.

51

52

53

54

55

56

57

58

59

60
